# Supplementary material for: Characteristics of Microstructural Changes Associated with Glioma Related Epilepsy: A Diffusion Tensor Imaging (DTI) Study
Source: MDPI journal article supplement (doi:10.3390/brainsci12091169), 2022-08-31
Supplement: s1 [file s1]

## Supplementary material

Supplementary Table S1.-Demographic and clinical characteristics

| Patient No. | Age<br>(years) | gender | Histopathological type                         | Tumor<br>volume(mm <sup>3</sup> ) |
|-------------|----------------|--------|------------------------------------------------|-----------------------------------|
| Sub010      | 50             | F      | Astrocytoma, WHO grade II                      | 27.34                             |
| Sub018      | 41             | M      | Glioblastoma , WHO grade IV                    | 127.40                            |
| Sub062      | 33             | F      | Astrocytoma, WHO grade II                      | 34.11                             |
| Sub071      | 27             | F      | mixed glial neuronal tumor, WHO<br>grade I     | 3.97                              |
| Sub072      | 48             | M      | Anaplastic astrocytoma , WHO grade<br>III-IV   | 54.88                             |
| Sub081      | 36             | F      | Oligoastrocytoma, WHO gradeII                  | 19.64                             |
| Sub087      | 54             | M      | Oligodendroglioma , WHO grade II               | 41.24                             |
| Sub100      | 44             | M      | Oligoastrocytoma, WHO gradeII                  | 7.76                              |
| Sub102      | 51             | M      | Oligodendroglioma , WHO grade II               | 40.78                             |
| Sub124      | 51             | M      | Astrocytoma, WHO grade II                      | 20.42                             |
| Sub125      | 19             | M      | Ganglioglioma, WHO grade I                     | 2.61                              |
| Sub176      | 65             | M      | Oligoastrocytoma, WHO gradeII                  | 22.02                             |
| Sub004      | 45             | M      | Glioblastoma , WHO grade IV                    | 115.91                            |
| Sub017      | 51             | M      | Anaplastic oligodendrocytoma, WHO<br>grade III | 39.70                             |
| Sub024      | 36             | F      | Oligodendroglioma , WHO grade II               | 24.10                             |
| Sub030      | 39             | M      | Oligoastrocytoma, WHO gradeII                  | 9.32                              |
| Sub061      | 45             | F      | Glioblastoma , WHO grade IV                    | 49.31                             |
| Sub063      | 56             | M      | Anaplastic astrocytoma , WHO grade<br>III      | 26.47                             |
| Sub082      | 46             | F      | Oligoastrocytoma, WHO gradeII                  | 58.86                             |
| Sub127      | 45             | F      | Glioblastoma , WHO grade IV                    | 3.72                              |
| Sub138      | 50             | M      | Oligoastrocytoma, WHO gradeII                  | 37.27                             |
| Sub152      | 49             | M      | Anaplastic astrocytoma , WHO grade<br>III      | 22.28                             |

|        |    |   |                                             |       |
|--------|----|---|---------------------------------------------|-------|
| Sub162 | 35 | F | Oligodendroglioma , WHO grade II            | 86.40 |
| Sub174 | 51 | M | Astrocytoma, WHO grade II                   | 65.24 |
| Sub175 | 45 | F | Anaplastic oligodendrocytoma, WHO grade III | 30.69 |

Supplementary Table S2.-Two studies related to GRE[1, 2]

| First author | Publish year | Tumor type                       | Patients |
|--------------|--------------|----------------------------------|----------|
| Yinyan Wang  | 2015         | low-grade glioma                 | 410      |
| Mao Yunhe    | 2020         | histologically confirmed gliomas | 119      |

1. Yunhe, M., et al., *Mapping seizure foci and tumor genetic factors in glioma associated seizure patients*. J Neurosurg Sci, 2020. **64**(5): p. 456-463.
2. Wang, Y., et al., *Localizing seizure-susceptible brain regions associated with low-grade gliomas using voxel-based lesion-symptom mapping*. Neuro Oncol, 2015. **17**(2): p. 282-8.
